# Supplementary material for: Meta-Analysis: Urinary Calprotectin for Discrimination of Intrinsic and Prerenal Acute Kidney Injury
Source: PubMed Central journal article supplement (PMC6352097; doi:10.3390/jcm8010074), 2019-01-10
Supplement: jcm-08-00074-s001.pdf [file jcm-08-00074-s001.pdf]

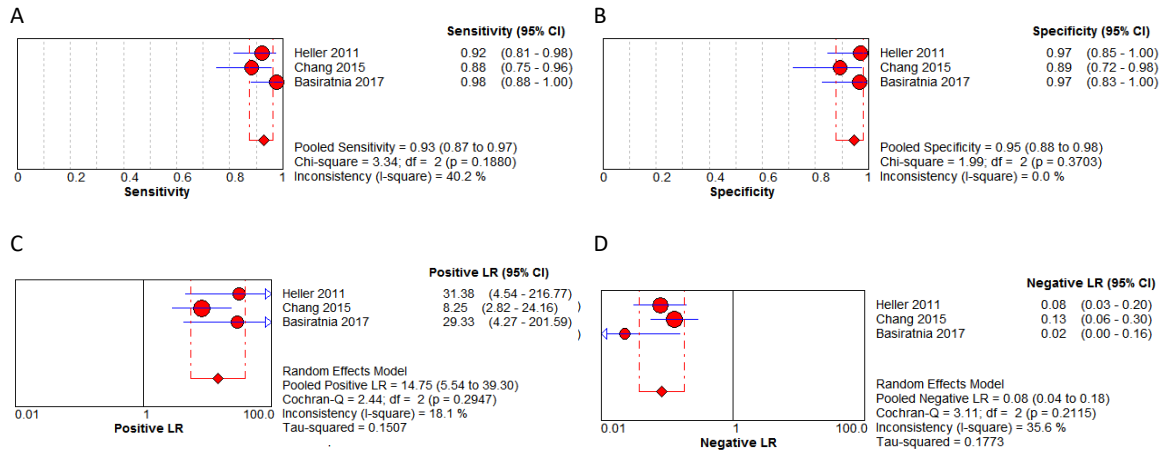

**Figure S1.** Diagnostic performance of the three studies providing data on urinary calprotectin with normalization to urine creatinine.

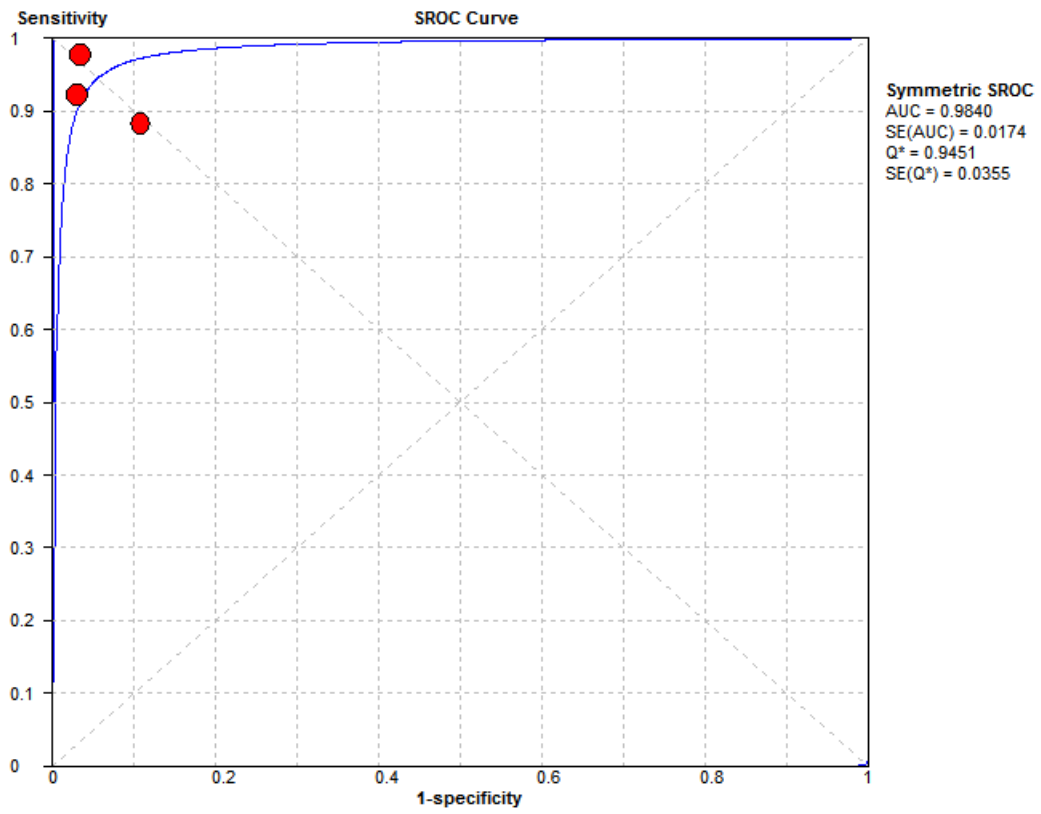

**Figure S2.** Symmetric SROC according to the cutoffs of the three studies with urinary calprotectin with normalization to urine creatinine. Abbreviation: SROC, summary receiving operating characteristics; AUC, area under the curve; SE, standard error.

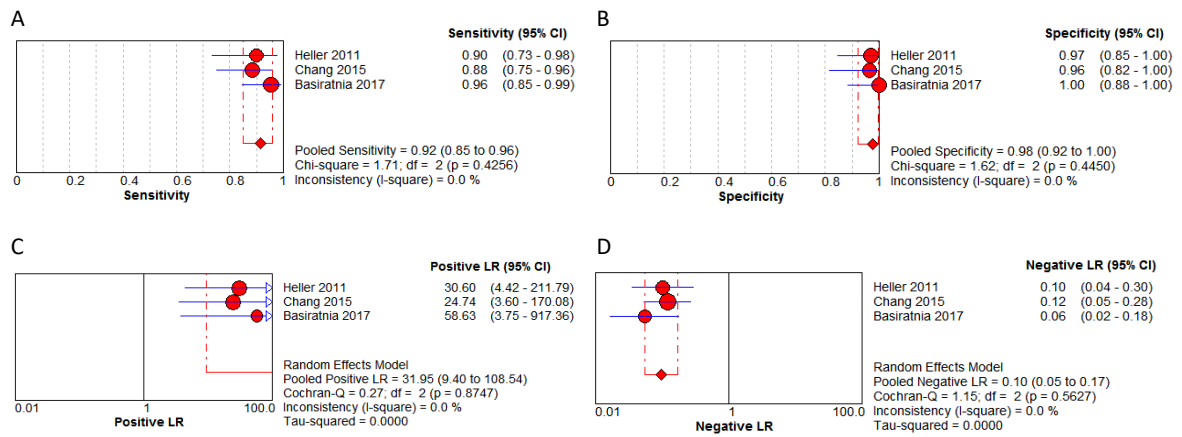

**Figure S3.** Diagnostic performance of urinary calprotectin with three studies excluding patients with urinary tract infection.

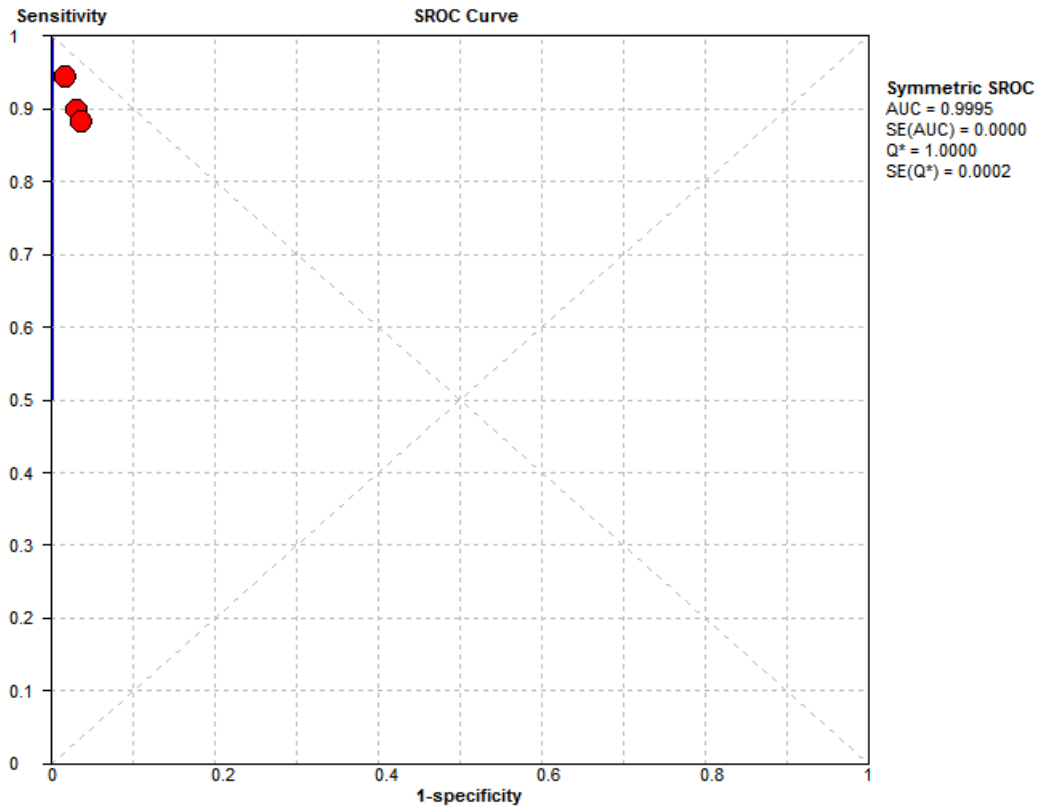

**Figure S4.** Symmetric SROC according to the cutoffs of the three studies excluding patients with urinary tract infection. Abbreviation: SROC, summary receiving operating characteristics; AUC, area under the curve; SE, standard error.

**Table S1.** Primary reasons for exclusion of excluded studies.

| First Author  | Last Author    | Journal                                                | Year | Title                                                                                                                                           | Primary Reason for Exclusion                                | Include |
|---------------|----------------|--------------------------------------------------------|------|-------------------------------------------------------------------------------------------------------------------------------------------------|-------------------------------------------------------------|---------|
| Azimi, A.     |                | Medical Hypotheses                                     | 2017 | Could “calprotectin” and “endocan” serve as “Troponin of Nephrologists”?                                                                        | Review article                                              | N       |
| Alexander, F. | Jens, H.W.     | Pediatric Nephrology                                   | 2017 | Urinary biomarkers of acute kidney injury in very low birth weight infants on indomethacin for patent ductus arteriosus                         | Not distinguish intrinsic and pre-renal acute kidney injury | N       |
| Chang, C.H.   | Chen, Y.C.     | Medicine                                               | 2015 | Urinary Biomarkers Improve the Diagnosis of Intrinsic Acute Kidney Injury in Coronary Care Units                                                | Include                                                     | Y       |
| Dessing, M.C. | Leemans, J.C.  | Kidney International                                   | 2015 | The calcium-binding protein complex S100A8/A9 has a crucial role in controlling macrophage-mediated renal repair following ischemia/reperfusion | Not human study                                             | N       |
| Dobrek, L.    | Thor, P.       | Polish Annals of Medicine                              | 2017 | Novel biomarkers of acute kidney injury and chronic kidney disease                                                                              | Review article                                              | N       |
| Ebbing, J.    | Westhoff, T.H. | World Journal of Urology                               | 2014 | Urinary calprotectin: a new diagnostic marker in urothelial carcinoma of the bladder                                                            | Not acute kidney injury study                               | N       |
| Ebbing, J.    | Westhoff, T.H. | PLoS One                                               | 2016 | Dynamics of Urinary Calprotectin after Renal Ischaemia                                                                                          | Not acute kidney injury study                               | N       |
| Fan, P.C.     | Chen, Y.C.     | Nephrology (Carlton)                                   | 2018 | Biomarkers for acute cardiorenal syndrome                                                                                                       | Review article                                              | N       |
| Fujigaki, Y.  | Yasuda, H.     | Japanese Journal of Nephrology                         | 2012 | Acute kidney injury                                                                                                                             | Review article                                              | N       |
| Gao, S.       | Liu, G.        | American Journal of Emergency Medicine                 | 2015 | Diagnostic and prognostic value of myeloid-related protein complex 8/14 for sepsis                                                              | Not urinary calprotectin                                    | N       |
| Heller, F.    | Westhoff, T.H. | Clinical Journal of the American Society of Nephrology | 2011 | Urinary calprotectin and the distinction between prerenal and intrinsic acute kidney injury                                                     | Include                                                     | Y       |

|                     |                      |                                                        |      |                                                                                                                                                                 |                                                             |   |
|---------------------|----------------------|--------------------------------------------------------|------|-----------------------------------------------------------------------------------------------------------------------------------------------------------------|-------------------------------------------------------------|---|
| Ikemoto, M.         | Fujita, M.           | Clinica Chimica Acta                                   | 2007 | Intrinsic function of S100A8/A9 complex as an anti-inflammatory protein in liver injury induced by lipopolysaccharide in rats                                   | Not human study                                             | N |
| Kim, A.J.           | Jung, J.Y.           | PLoS One                                               | 2016 | Klotho and S100A8/A9 as Discriminative Markers between Pre-Renal and Intrinsic Acute Kidney Injury                                                              | Not human study                                             | N |
| Kashani, K.         | Ronco, C.            | Clinical Chemistry and Laboratory Medicine             | 2017 | Biomarkers of acute kidney injury: the pathway from discovery to clinical adoption                                                                              | Review article                                              | N |
| Lee, C.W.           | Tsai, H.I.           | World Journal of Emergency Surgery                     | 2018 | A combination of SOFA score and biomarkers gives a better prediction of septic AKI and in-hospital mortality in critically ill surgical patients: a pilot study | Not distinguish intrinsic and pre-renal acute kidney injury | N |
| Basiratnia, M.      | Hooman, N.           | Iranian Journal of Pediatrics                          | 2017 | Urinary calprotectin as a marker to distinguish functional and structural acute kidney injury in pediatric population                                           | Include                                                     | Y |
| Ostermann, M.       | Forni, L.G.          | Critical Care                                          | 2012 | Clinical review: Biomarkers of acute kidney injury: where are we now?                                                                                           | Review article                                              | N |
| Ortega-Loubon, C.   | Fulquet-Carreras, E. | Annals of Cardiac Anaesthesia                          | 2016 | Cardiac surgery-associated acute kidney injury                                                                                                                  | Review article                                              | N |
| Plebani, M.         |                      | Clinical Chemistry and Laboratory Medicine             | 2017 | Biomarkers of acute kidney injury: a step forward                                                                                                               | Review article                                              | N |
| Rekers, N.V.        | Eikmans, M.          | American Journal of Transplantation                    | 2016 | Beneficial Immune Effects of Myeloid-Related Proteins in Kidney Transplant Rejection                                                                            | Not acute kidney injury study                               | N |
| Szeto, C.C.         | Li, P.K.             | Clinical Journal of the American Society of Nephrology | 2010 | Urinary expression of kidney injury markers in renal transplant recipients                                                                                      | Not acute kidney injury study                               | N |
| Schrezenmeier, E.V. | Schmidt-Ott, K.M.    | Acta Physiologica (oxford)                             | 2017 | Biomarkers in acute kidney injury – pathophysiological basis and clinical performance                                                                           | Review article                                              | N |
| Seibert, F.S.       | Westhoff, T.H.       | Acta Physiologica (oxford)                             | 2013 | Calprotectin and neutrophil gelatinase-associated lipocalin in the differentiation of pre-renal and intrinsic acute kidney injury                               | Include                                                     | Y |
| Seibert, F.S.       | Westhoff, T.H.       | Transplantation                                        | 2016 | Urinary Calprotectin Differentiates Between Prerenal and Intrinsic Acute Renal Allograft Failure                                                                | Include                                                     | Y |

|                   |                |                                      |      |                                                                                                                                                                       |                               |   |
|-------------------|----------------|--------------------------------------|------|-----------------------------------------------------------------------------------------------------------------------------------------------------------------------|-------------------------------|---|
| Seibert, F.S.     | Westhoff, T.H. | Kidney & blood pressure research     | 2018 | Prognostic Value of Urinary Calprotectin, NGAL and KIM-1 in Chronic Kidney Disease                                                                                    | Not acute kidney injury study | N |
| Tan, X.           | Lin, Y.        | Cellular Physiology and Biochemistry | 2017 | Involvement of S100A8/A9-TLR4-NLRP3 Inflammasome Pathway in Contrast-Induced Acute Kidney Injury                                                                      | Not human study               | N |
| Tepel, M.         | Westhoff, T.H. | PLoS One                             | 2014 | Urinary calprotectin and posttransplant renal allograft injury                                                                                                        | Not acute kidney injury study | N |
| Vanmassenhove, J. | Ostermann, M.  | Intensive Care Medicine              | 2017 | Have renal biomarkers failed in acute kidney injury? Yes                                                                                                              | Review article                | N |
| Westhoff, J.H.    | Westhoff, T.H. | Pediatric Nephrology                 | 2016 | Urinary biomarkers for the differentiation of prerenal and intrinsic pediatric acute kidney injury                                                                    | Include                       | Y |
| Westhoff, J.H.    | Westhoff, T.H. | European Journal of Pediatrics       | 2017 | Urinary calprotectin, kidney injury molecule-1, and neutrophil gelatinase-associated lipocalin for the prediction of adverse outcome in pediatric acute kidney injury | Duplication cohort            | N |
